# Supplementary material
Source: PubMed Central journal article supplement (PMC6960461)

**Supplemental Table 1: Association of transplant variables with the recovery of CD4+ T-cell subsets.**

| Variable                               | Naïve CD4+ T cells      |         | CM CD4+ T cells         |              | EM CD4+ T cells        |         | Effector CD4+ T cells  |         | Activated CD4+ T cells  |         |
|----------------------------------------|-------------------------|---------|-------------------------|--------------|------------------------|---------|------------------------|---------|-------------------------|---------|
|                                        | Slope (95%CI)           | P-value | Slope (95%CI)           | P-value      | Slope (95%CI)          | P-value | Slope (95%CI)          | P-value | Slope (95%CI)           | P-value |
| <b>Age (10 years)</b>                  | -0.171 (-0.376, 0.033)  | 0.105   | -0.052 (-0.225, 0.121)  | 0.558        | 0.038 (-0.127, 0.204)  | 0.653   | 0.070 (-0.096, 0.237)  | 0.410   | 0.045 (-0.088, 0.179)   | 0.509   |
| <b>8-allele HLA-match*</b>             |                         | 0.456   |                         | 0.123        |                        | 0.808   |                        | 0.620   |                         | 0.609   |
| < 5/8                                  | reference               |         | reference               |              | reference              |         | reference              |         | reference               |         |
| ≥ 5/8                                  | 0.207 (-0.333, 0.748)   |         | 0.354 (-0.089, 0.798)   |              | 0.054 (-0.378, 0.485)  |         | -0.111 (-0.544, 0.324) |         | -0.090 (-0.432, 0.251)  |         |
| <b>Infused viable CD34+ cell dose*</b> |                         | 0.292   |                         | 0.725        |                        | 0.017   |                        | 0.992   |                         | 0.046   |
| < 1.18 x 10 <sup>5</sup>               | reference               |         | reference               |              | reference              |         | reference              |         | reference               |         |
| ≥ 1.18 x 10 <sup>5</sup>               | -0.265 (-0.754, 0.222)  |         | 0.073 (-0.335, 0.480)   |              | 0.472 (0.094, 0.851)   |         | 0.002 (-0.393, 0.396)  |         | 0.322 (0.013, 0.636)    |         |
| <b>Infused viable CD3+ cell dose*</b>  |                         | 0.043   |                         | 0.405        |                        | 0.949   |                        | 0.265   |                         | 0.836   |
| < 3.335 x 10 <sup>6</sup>              | reference               |         | reference               |              | reference              |         | reference              |         | reference               |         |
| ≥ 3.335 x 10 <sup>6</sup>              | 0.506 (0.026, 0.990)    |         | 0.175 (-0.233, 0.586)   |              | -0.013 (-0.406, 0.380) |         | 0.226 (-0.168, 0.621)  |         | 0.034 (-0.283, 0.351)   |         |
| <b>CMV reactivation by day 60</b>      |                         | 0.038   |                         | <b>0.002</b> |                        | 0.082   |                        | 0.738   |                         | 0.386   |
| No CMV reactivation                    | reference               |         | reference               |              | Reference              |         | Reference              |         | reference               |         |
| CMV reactivation                       | -0.534 (-1.029, -0.040) |         | -0.644 (-1.046, -0.242) |              | -0.364 (-0.769, 0.041) |         | 0.070 (-0.336, 0.475)  |         | 0.150 (-0.186, 0.487)   |         |
| <b>Day 100 aGVHD grade</b>             |                         | 0.921   |                         | 0.102        |                        | 0.389   |                        | 0.186   |                         | 0.048   |
| 0-I                                    | reference               |         | reference               |              | reference              |         | reference              |         | reference               |         |
| II                                     | -0.007 (-0.671, 0.657)  |         | -0.346 (-0.887, 0.196)  |              | -0.290 (-0.830, 0.250) |         | 0.276 (-0.248, 0.800)  |         | -0.377 (-0.807, 0.051)  |         |
| III-IV                                 | -0.138 (-0.956, 0.680)  |         | -0.740 (-1.407, -0.075) |              | -0.465 (-1.129, 0.199) |         | 0.609 (-0.033, 1.250)  |         | -0.669 (-1.185, -0.155) |         |

\* engrafting CB unit

There was no association with the variables of recipient gender, diagnosis (acute leukemia vs. MDS/MPD vs. lymphoma), or the addition of haplo-identical CD34+ cells (data not shown).

**Supplemental Table 2: Association of transplant variables with the recovery of CD8+ T-cell subsets.**

| Variable                               | Naïve CD8+ T cells     |         | CM CD8+ T cells        |         | EM CD8+ T cells        |              | Effector CD8+ T cells   |                  | Activated CD8+ T cells  |                  |
|----------------------------------------|------------------------|---------|------------------------|---------|------------------------|--------------|-------------------------|------------------|-------------------------|------------------|
|                                        | Slope (95%CI)          | P-value | Slope (95%CI)          | P-value | Slope (95%CI)          | P-value      | Slope (95%CI)           | P-value          | Slope (95%CI)           | P-value          |
| <b>Age (10 years)</b>                  | -0.112 (-0.285, 0.060) | 0.209   | 0.019 (-0.122, 0.159)  | 0.797   | 0.082 (-0.147, 0.312)  | 0.486        | 0.160 (-0.081, 0.402)   | 0.197            | 0.140 (-0.069, 0.350)   | 0.195            |
| <b>8-allele HLA-match*</b>             |                        | 0.930   |                        | 0.559   |                        | 0.240        |                         | 0.047            |                         | 0.021            |
| < 5/8                                  | reference              |         | reference              |         | reference              |              | reference               |                  | reference               |                  |
| ≥ 5/8                                  | 0.020 (-0.430, 0.473)  |         | 0.109 (-0.253, 0.472)  |         | -0.355 (-0.940, 0.230) |              | -0.636 (-1.252, -0.021) |                  | -0.622 (-1.139, -0.106) |                  |
| <b>Infused viable CD34+ cell dose*</b> |                        | 0.460   |                        | 0.557   |                        | <b>0.001</b> |                         | 0.028            |                         | <b>&lt;0.001</b> |
| < 1.18 x 10 <sup>5</sup>               | reference              |         | reference              |         | reference              |              | reference               |                  | reference               |                  |
| ≥ 1.18 x 10 <sup>5</sup>               | -0.156 (-0.569, 0.253) |         | 0.100 (-0.233, 0.429)  |         | 0.918 (0.417, 1.421)   |              | 0.636 (0.079, 1.194)    |                  | 0.861 (0.401, 1.324)    |                  |
| <b>Infused viable CD3+ cell dose*</b>  |                        | 0.183   |                        | 0.637   |                        | 0.815        |                         | 0.710            |                         | 0.691            |
| < 3.335 x 10 <sup>6</sup>              | reference              |         | reference              |         | reference              |              | reference               |                  | reference               |                  |
| ≥ 3.335 x 10 <sup>6</sup>              | 0.281 (-0.127, 0.692)  |         | 0.081 (-0.252, 0.415)  |         | -0.065 (-0.610, 0.478) |              | -0.110 (-0.687, 0.467)  |                  | -0.101 (-0.598, 0.395)  |                  |
| <b>CMV reactivation by day 60</b>      |                        | 0.809   |                        | 0.706   |                        | <b>0.002</b> |                         | <b>&lt;0.001</b> |                         | <b>&lt;0.001</b> |
| No CMV reactivation                    | reference              |         | reference              |         | reference              |              | reference               |                  | reference               |                  |
| CMV reactivation                       | -0.052 (-0.477, 0.371) |         | 0.068 (-0.283, 0.421)  |         | 0.896 (0.354, 1.437)   |              | 1.833 (1.390, 2.274)    |                  | 1.526 (1.149, 1.898)    |                  |
| <b>Day 100 aGVHD grade</b>             |                        | 0.946   |                        | 0.713   |                        | 0.770        |                         | 0.499            |                         | 0.804            |
| 0-I                                    | reference              |         | reference              |         | reference              |              | reference               |                  | reference               |                  |
| II                                     | -0.065 (-0.626, 0.496) |         | -0.189 (-0.662, 0.285) |         | -0.129 (-0.893, 0.632) |              | 0.406 (-0.396, 1.205)   |                  | 0.201 (-0.487, 0.886)   |                  |
| III-IV                                 | 0.017 (-0.670, 0.703)  |         | -0.081 (-0.659, 0.495) |         | -0.338 (-1.267, 0.589) |              | 0.572 (-0.412, 1.553)   |                  | 0.049 (-0.777, 0.872)   |                  |

\* engrafting CB unit

There was no association with the variables of recipient gender, diagnosis (acute leukemia vs. MDS/MPD vs. lymphoma), or the addition of haplo-identical CD34+ cells (data not shown).

## **Supplemental Figure Legends**

**Figure S1. Association of CMV reactivation with CD4+ T-cell subset recovery in adult CBT recipients.** (A) Naïve CD4+ T cells. (B) CM CD4+ T cells. (C) EM CD4+ T cells. (D) Effector CD4+ T cells. (E) Activated CD4+ T cells. Individual patient time-points in panels A-E are color coded according to CMV reactivation by day 60. Curves are Loess-smoothed averages.

**Figure S2. Association of CMV reactivation with CD8+ T-cell subset recovery in adult CBT recipients.** (A) Naïve CD8+ T cells. (B) CM CD8+ T cells. (C) EM CD8+ T cells. (D) Effector CD8+ T cells. (E) Activated CD8+ T cells. Individual patient time-points in panels A-E are color coded according to CMV reactivation by day 60. Curves are Loess-smoothed averages.

Figure S1A. Naïve CD4+ T-cell recovery according to CMV reactivation

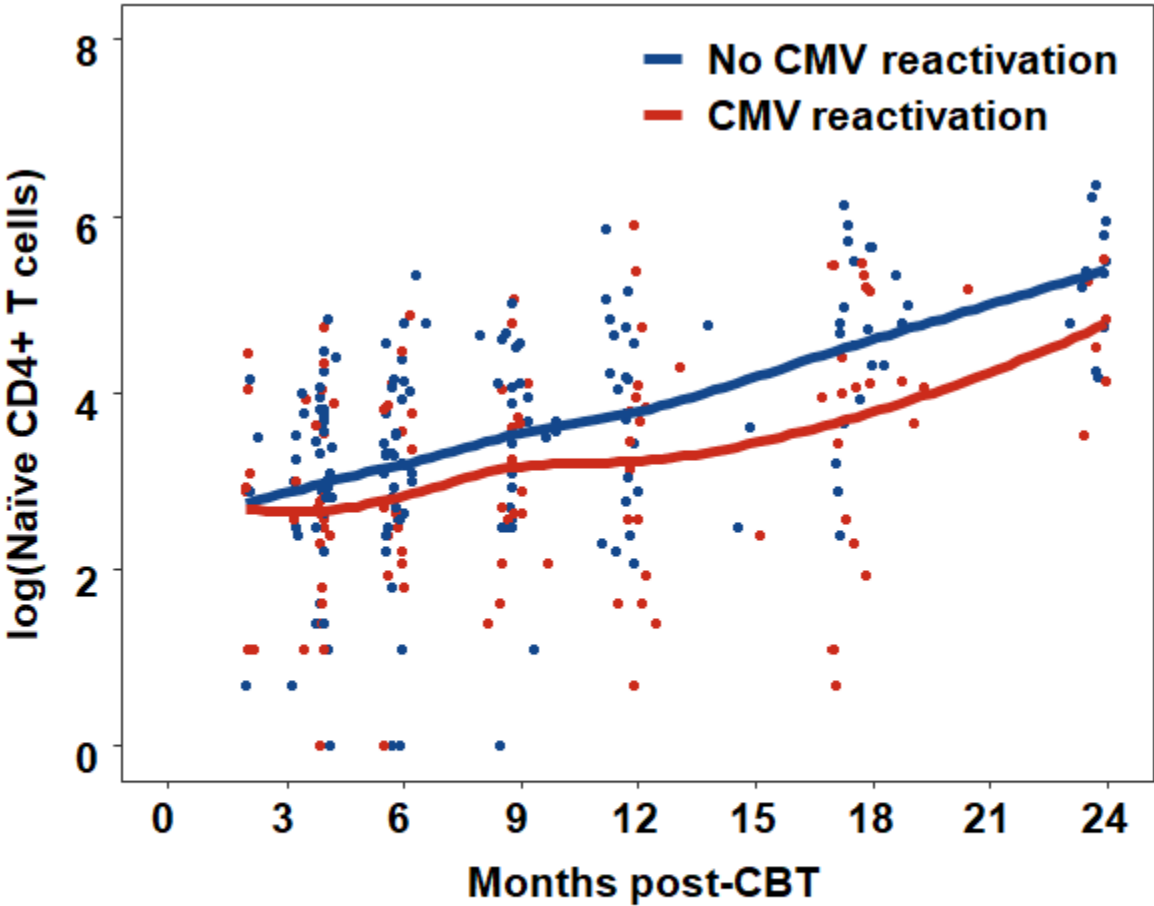

Figure S1B. CM CD4+ T-cell recovery according to CMV reactivation

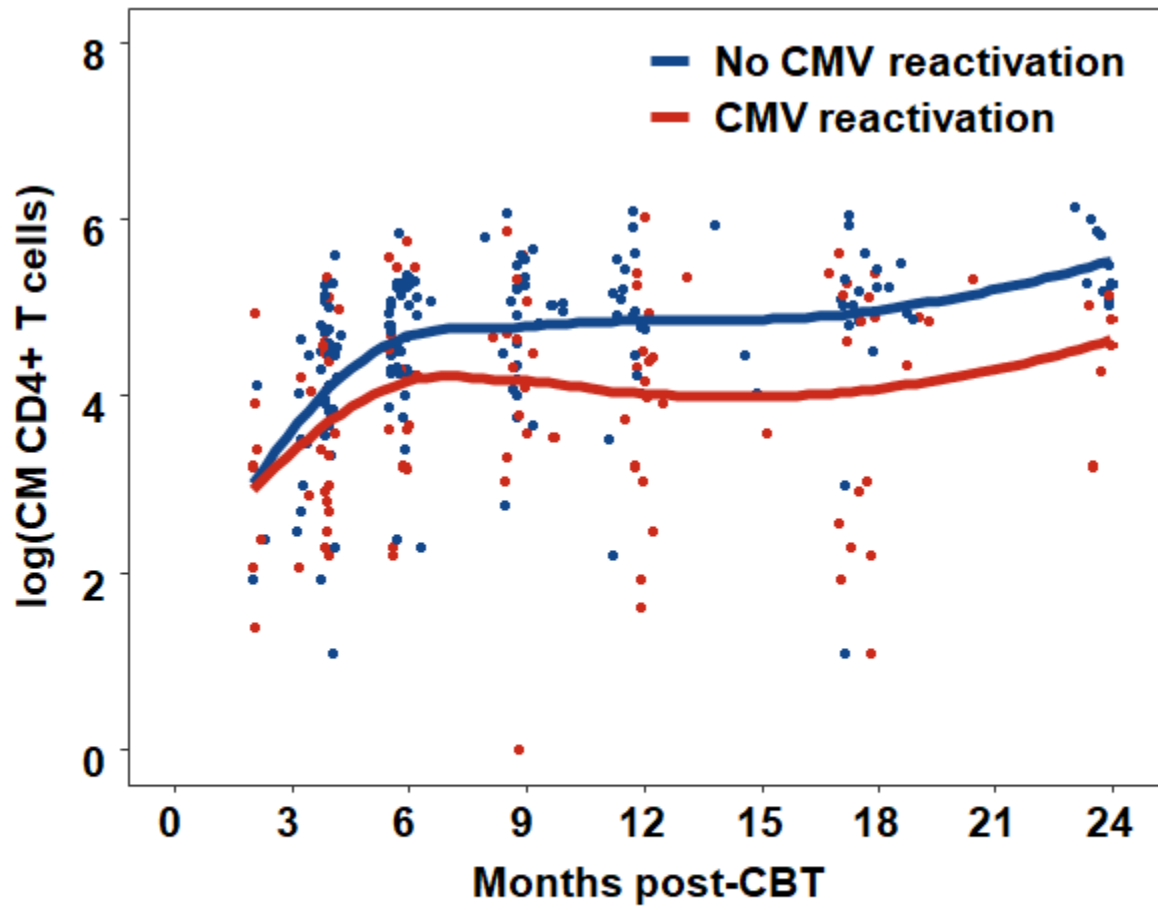

Figure S1C. EM CD4+ T-cell recovery according to CMV reactivation

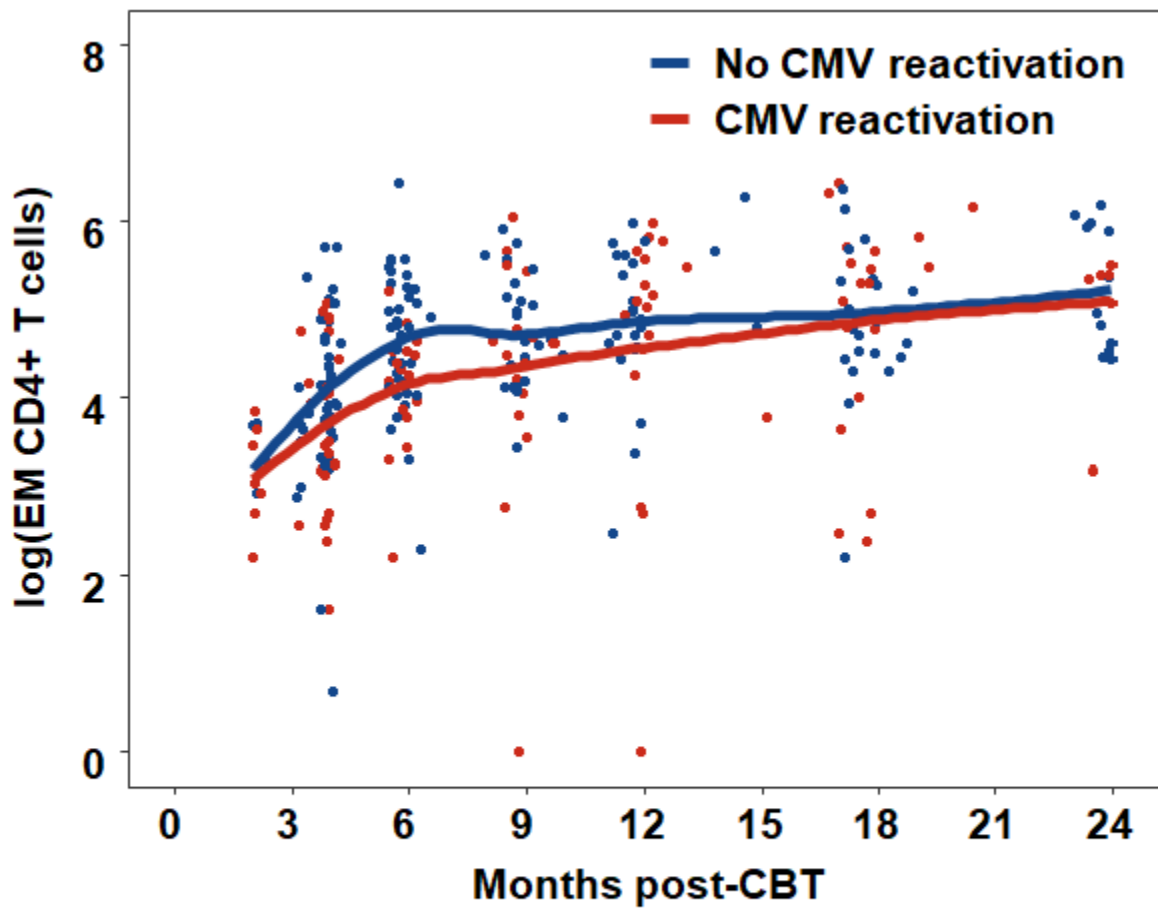

Figure S1D. Effector CD4+ T-cell recovery according to CMV reactivation

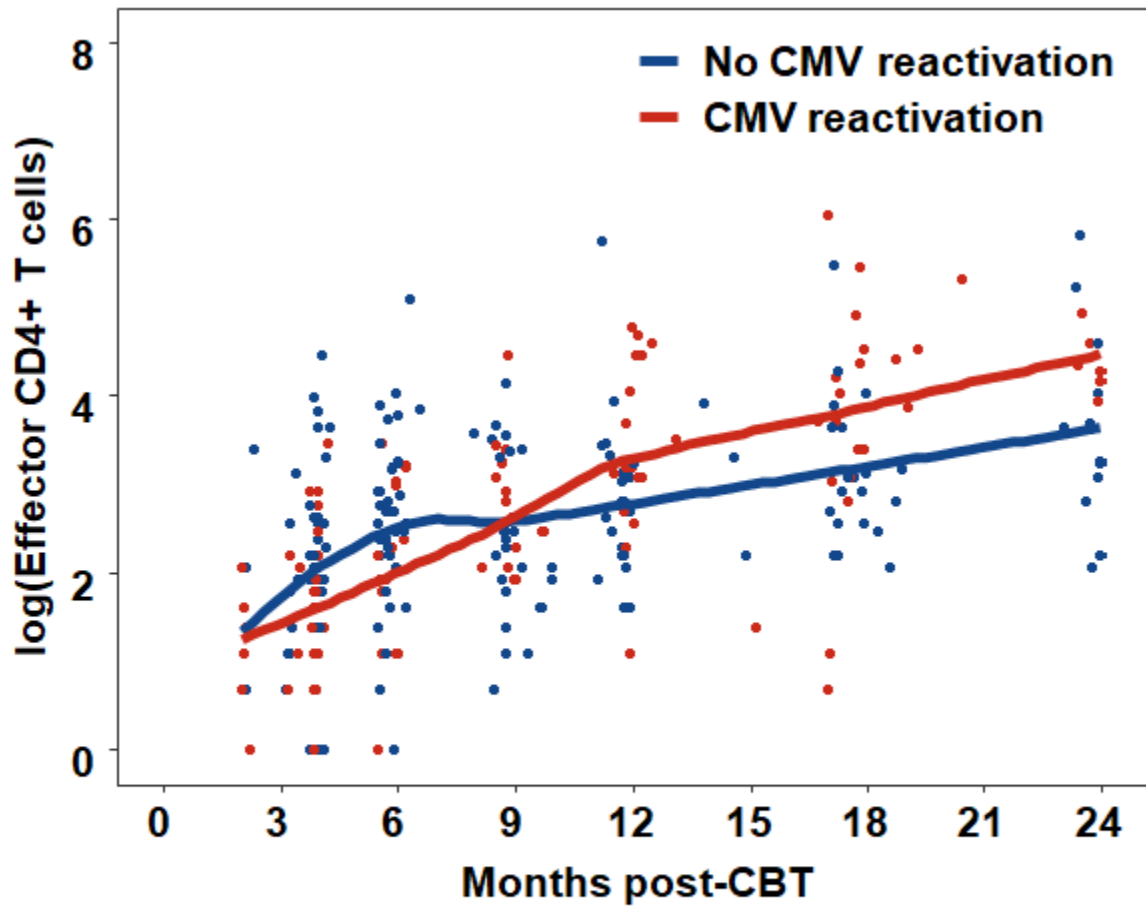

Figure S1E. Activated CD4+ T-cell recovery according to CMV reactivation

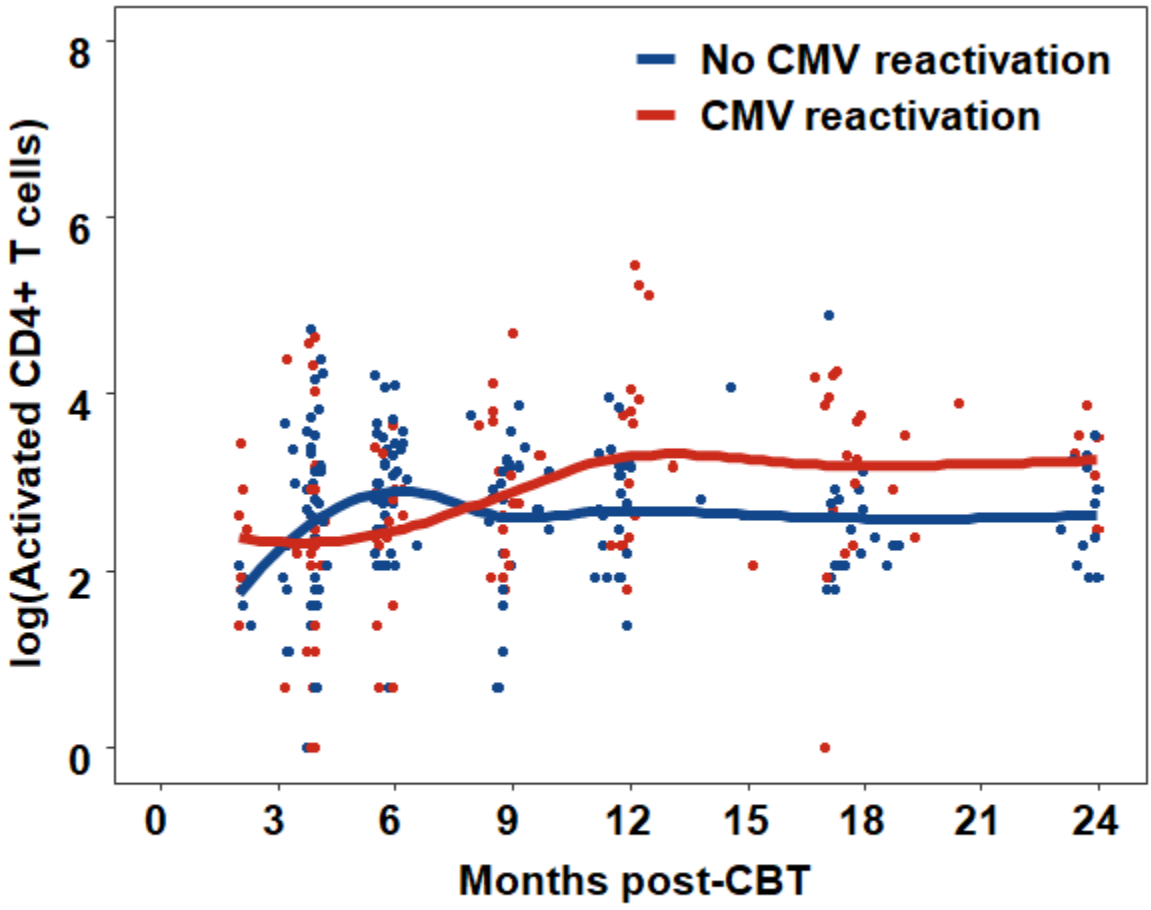



Figure S2A. Naïve CD8+ T-cell recovery according to CMV reactivation

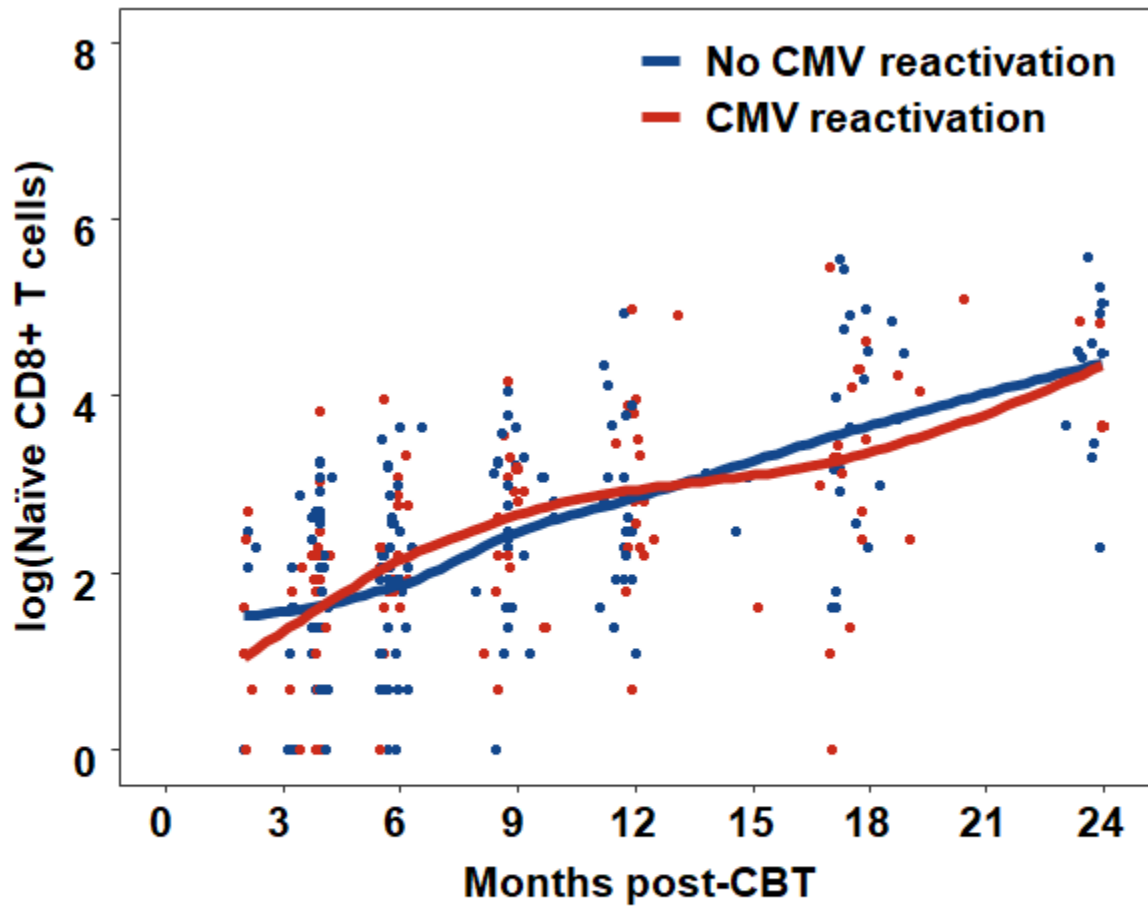

Figure S2B. CM CD8+ T-cell recovery according to CMV reactivation

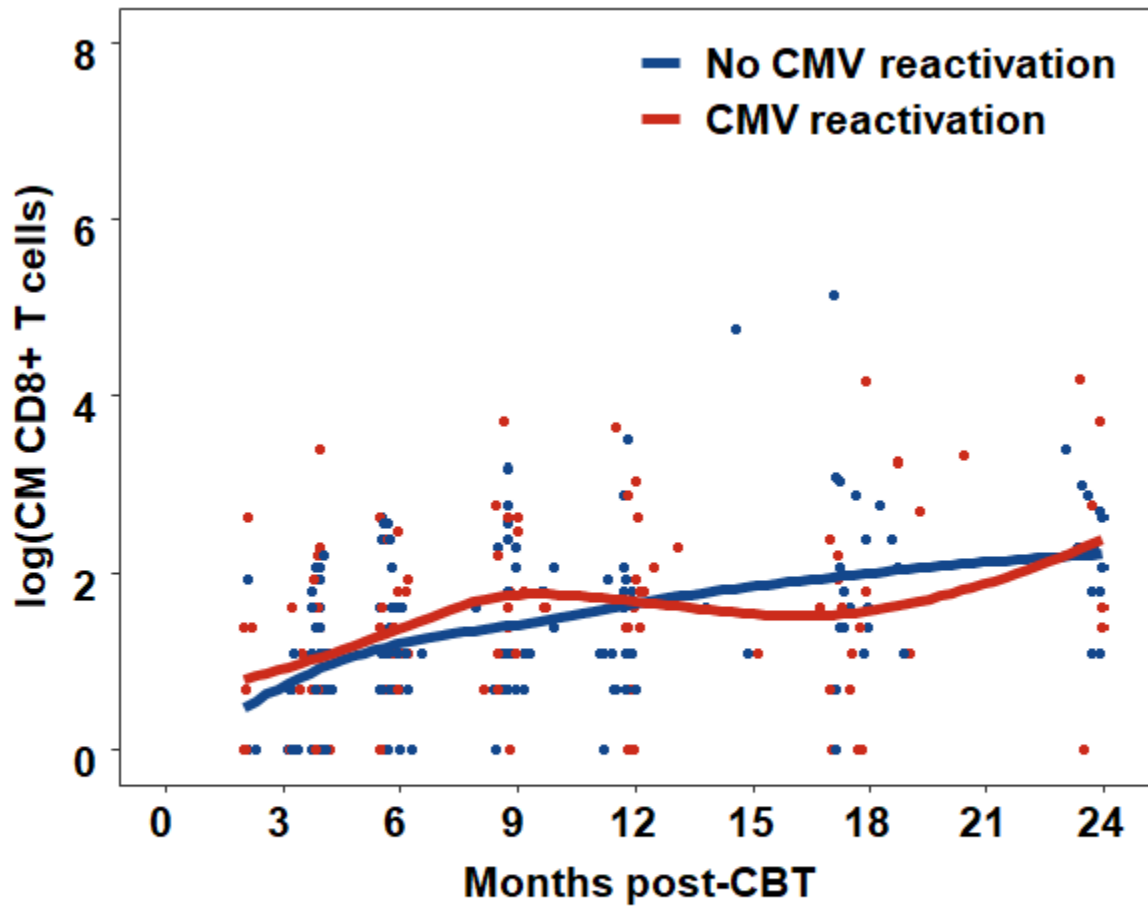

Figure S2C. EM CD8+ T-cell recovery according to CMV reactivation

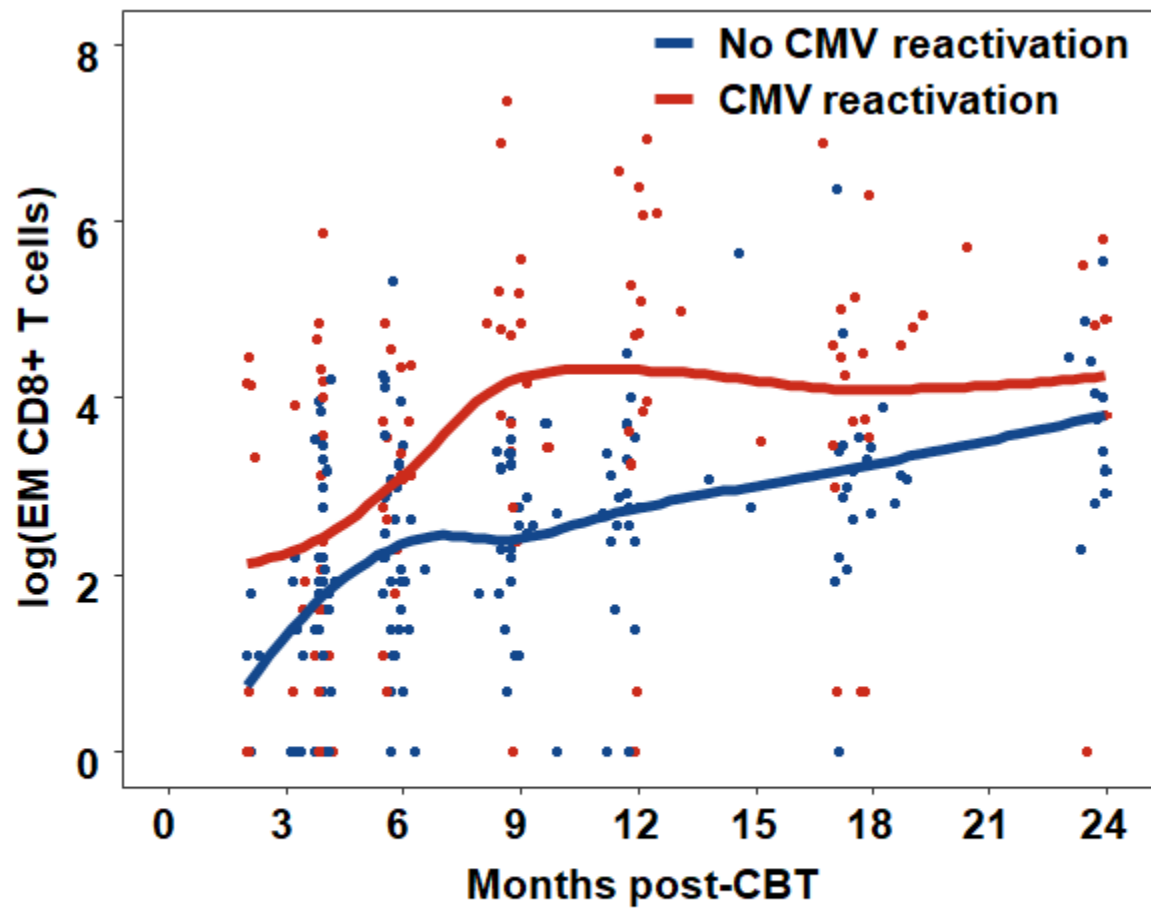

Figure S2D. Effector CD8+ T-cell recovery according to CMV reactivation

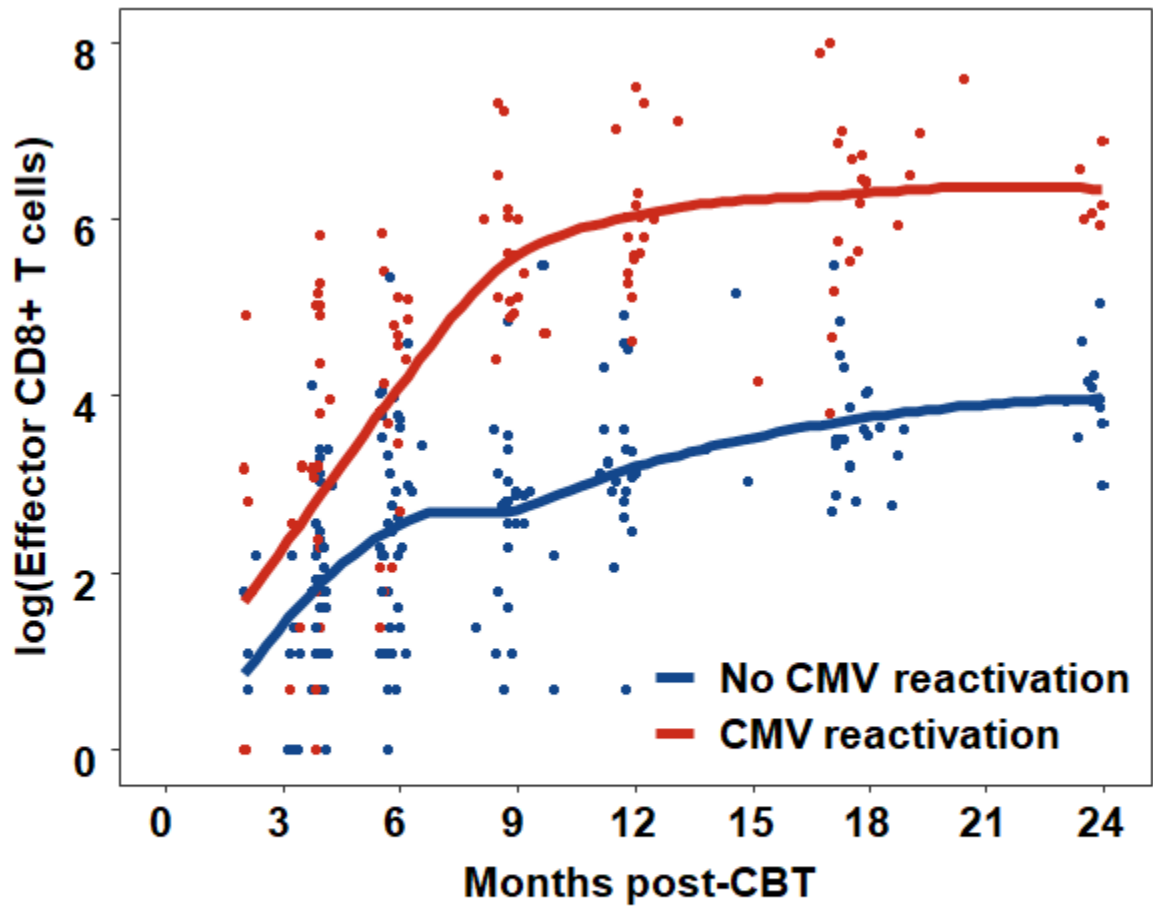

Figure S2E. Activated CD8+ T-cell recovery according to CMV reactivation

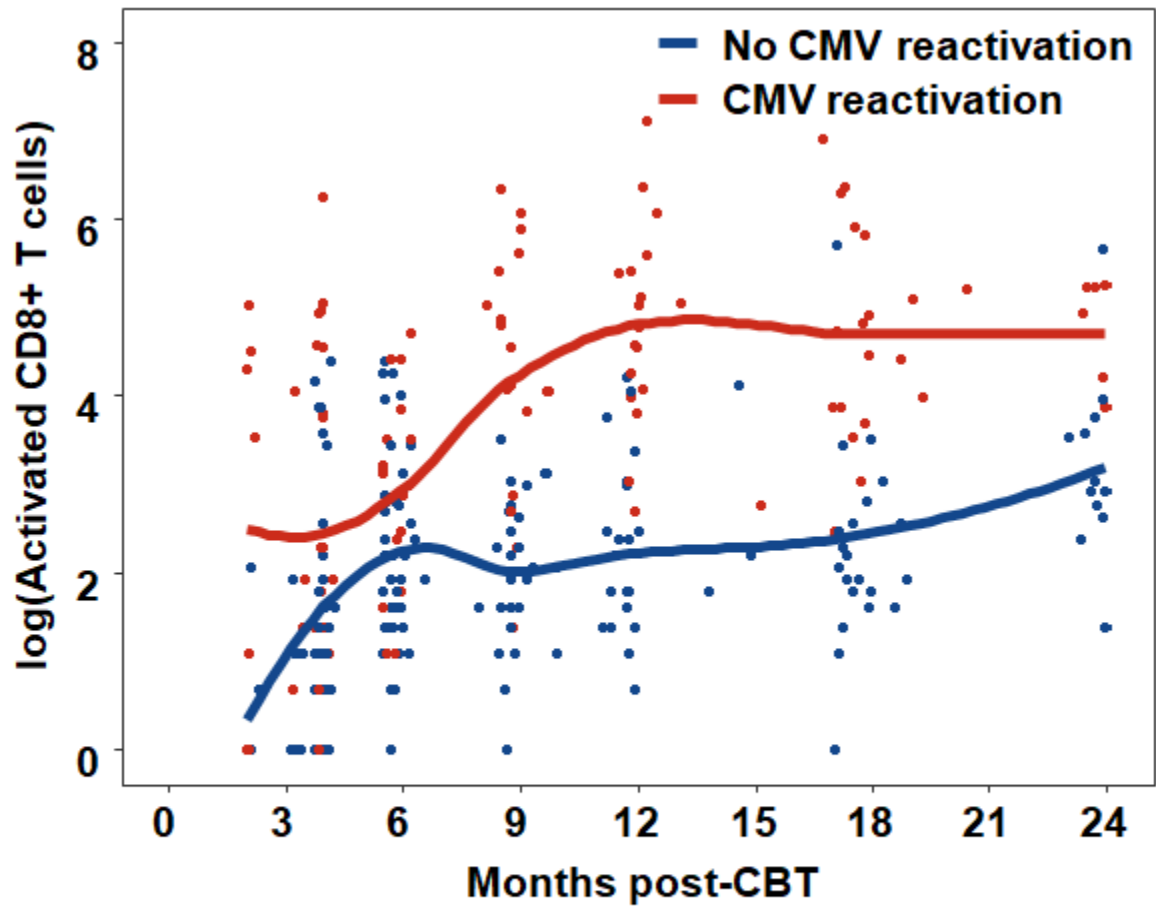

Supplement: baADV2019000836-suppl1.pdf [file baADV2019000836-suppl1.pdf]
